# Supplementary material for: A methodology for linking 2D overland flow models with the sewer network model SWMM 5.1 based on dynamic link libraries
Source: Oxford University Press journal article supplement (doi:10.2166/wst.2016.171), 2016-04-11
Supplement: wst2016171supp.docx [file wst2016171supp.docx]

**A Methodology for Linking 2D Overland Flow Models with the Sewer Network Model SWMM 5.1 Based on Dynamic Link Libraries.**

Jorge Leandro, Ricardo Martins

**Supplementary Material**

int DLLEXPORT Swmm_Link(double* NodeID,int* NodeID_j, double* S_Node_Crest, double* S_Node_Bottom,double* TotalDuration2, double* SWMM_DT)

//

// Input: NodeID = Node ID to add discharge flow

// NodeID_j = Node ID j index to add discharge flow

// TotalDuration2 = total SWMM duration

// SWMM_DT = RouteStep SWMM

// Output: returns error code

// Purpose: identify the j index of each node, total duration and route step.

//

{

int j;

double xid;

for (j = 0; j < Nobjects[NODE]; j++)

{

xid= strtod(Node[j].ID, NULL);

if ((Node[j].type!=1) && xid==*NodeID)

{

*NodeID_j=j;

*S_Node_Crest=(Node[j].invertElev+Node[j].fullDepth)* UCF(LENGTH);

*S_Node_Bottom=(Node[j].invertElev)* UCF(LENGTH);

}

}

*TotalDuration2=TotalDuration/1000.00; //(sec)

*SWMM_DT=RouteStep; //(sec)

return ErrorCode;

}

int DLLEXPORT Swmm_to_2D( int* NodeID_j, double* S_Node_Watlevel)

//

// Input: NodeID_j = Node ID j index to exchange discharge flow

// S_Node_Watlevel = water level elevation

// Output: returns error code

// Purpose: obtain the water level in SWMM Node.

//

{

int j;

double factor;

j=*NodeID_j;

*S_Node_Watlevel=(Node[j].invertElev+Node[j].newDepth)* UCF(LENGTH);

return ErrorCode;

}

int DLLEXPORT 2D_to_Swmm(int* NodeID_j, double* Node_Q)

//

// Input: NodeID = Node ID to exchange discharge flow

// Node_Q = discharge value to exchange

// Output: returns error code

// Purpose: exchange discharge from 2D to SWMM.

//

{

int j;

double factor;

j=*NodeID_j;

Node[j].extInflow->baseline = *Node_Q;

return ErrorCode;

}
